# Supplementary material
Source: publisher figshare collection journal article supplement (https://frontiersin.figshare.com/ndownloader/files/22149960)
Supplement: Supplementary file 1 [file 22149960]

**Supplementary Table 2.** Statistical summary of subjective votes

| Space | Season | Samples | Thermal sensation vote | | Preference vote | | | Thermal comfort vote | | Thermal acceptability vote | |
| --- | --- | --- | --- | --- | --- | --- | --- | --- | --- | --- | --- |
|  |  |  | (scale units) | | (samples) | | | (samples) | | (samples) | |
|  |  |  | AVE | S.D. | Warmer | Cooler | As it is | Uncomfort- ably cool | Uncomfort- ably warm | Unaccept- ably cool | Unaccept- ably warm |
| O | Spring | 117 | -1.0 | 1.2 | 47 | 3 | 67 | 16 | 1 | 13 | 0 |
|  | Summer | 297 | -0.2 | 1.6 | 4 | 107 | 186 | 2 | 20 | 1 | 13 |
|  | Autumn | 141 | -1.1 | 1.0 | 40 | 2 | 99 | 11 | 0 | 9 | 0 |
|  | Winter | 49 | -2.0 | 1.3 | 33 | 0 | 16 | 15 | 0 | 13 | 0 |
|  |  |  |  |  |  |  |  |  |  |  |  |
| T | Spring | 143 | -0.8 | 1.5 | 52 | 9 | 82 | 22 | 3 | 11 | 1 |
|  | Summer | 238 | 0.4 | 1.5 | 8 | 74 | 156 | 2 | 28 | 1 | 14 |
|  | Autumn | 187 | -0.6 | 1.5 | 62 | 9 | 116 | 16 | 3 | 16 | 2 |
|  | Winter | 125 | -1.1 | 1.7 | 68 | 0 | 57 | 21 | 0 | 6 | 0 |
|  |  |  |  |  |  |  |  |  |  |  |  |
| P | Spring | 136 | -0.2 | 0.9 | 11 | 12 | 113 | 2 | 2 | 0 | 3 |
|  | Summer | 289 | 0.4 | 1.3 | 7 | 113 | 169 | 3 | 40 | 2 | 22 |
|  | Autumn | 158 | 0.2 | 0.9 | 8 | 22 | 128 | 2 | 1 | 0 | 4 |
|  | Winter | 115 | -0.4 | 1.2 | 41 | 3 | 71 | 10 | 1 | 10 | 1 |
|  |  |  |  |  |  |  |  |  |  |  |  |
| B | Spring | 118 | -0.6 | 1.0 | 21 | 8 | 89 | 5 | 2 | 6 | 2 |
|  | Summer | 327 | -0.7 | 1.0 | 15 | 37 | 275 | 4 | 8 | 4 | 4 |
|  | Autumn | 149 | -0.7 | 1.3 | 62 | 2 | 85 | 26 | 0 | 12 | 0 |
|  | Winter | 122 | -0.6 | 1.2 | 43 | 1 | 78 | 12 | 0 | 8 | 0 |
